# Supplementary material for: Transforming growth factor-β pathway activity in glioblastoma
Source: PubMed Central journal article supplement (PMC4467414; doi:10.18632/oncotarget.3467), 2015-02-28
Supplement: oncotarget-06-5963-s001.pdf [file oncotarget-06-5963-s001.pdf]

## Transforming growth factor- $\beta$ pathway activity in glioblastoma

### Supplementary Material

#### SUPPLEMENTARY TABLES

**Supplementary Table 1:** *List of genes and Affymetrix probesets used in the TCGA database.*

| Affymetrix probeset ID | Gene symbol    |
|------------------------|----------------|
| 203085_s_at            | TGF- $\beta_1$ |
| 209909_s_at            | TGF- $\beta_2$ |
| 209747_at              | TGF- $\beta_3$ |
| 204200_s_at            | PDGFB          |
| 202627_at              | Serpine1*      |

\*Serpine1 = PAI-1

**Supplementary Table 2: Individual patient characteristics.**

| Patient ID | Age   | Age | Gender | Disease status | Extent of Resection* | KPS (%)*    | MGMT promotor methylation | First-line therapy | PD         | PFS [months] | OS [months] |     |
|------------|-------|-----|--------|----------------|----------------------|-------------|---------------------------|--------------------|------------|--------------|-------------|-----|
| P1         | ZH18  | 57  | -      | M              | newly diagnosed      | subtotal    | 80                        | n.d.               | TMZ/RT→TMZ | yes          | 1           | 16  |
| P2         | ZH41  | 46  | -      | F              | newly diagnosed      | subtotal    | 90                        | n.d.               | TMZ/RT→TMZ | yes          | 1           | 39  |
| P3         | ZH44  | 68  | -      | M              | newly diagnosed      | gross total | 70                        | n.d.               | TMZ/RT→TMZ | yes          | 12          | 24  |
| P4_A       | ZH45  | 57  | -      | F              | newly diagnosed      | gross total | 70                        | n.d.               | TMZ/RT→TMZ | yes          | 6           | 10  |
| P5         | ZH52  | 57  | -      | M              | newly diagnosed      | partial     | 60                        | n.d.               | TMZ/RT→TMZ | yes          | 7           | 13  |
| P6_B       | ZH58  | 72  | -      | F              | newly diagnosed      | gross total | 70                        | n.d.               | RT         | yes          | 12          | 29  |
| P7         | ZH79  | 50  | -      | M              | newly diagnosed      | subtotal    | 100                       | n.d.               | TMZ/RT→TMZ | n.d.         | 60          | 60+ |
| P8         | ZH92  | 72  | -      | M              | newly diagnosed      | subtotal    | 80                        | n.d.               | RT         | yes          | 2           | 2+  |
| P9         | ZH104 | 65  | -      | M              | newly diagnosed      | subtotal    | 90                        | n.d.               | TMZ/RT→TMZ | yes          | 33          | 48  |
| P10        | ZH109 | 51  | -      | M              | newly diagnosed      | subtotal    | 60                        | no                 | TMZ/RT→TMZ | yes          | 6           | 11+ |
| P11        | ZH120 | 47  | -      | M              | newly diagnosed      | subtotal    | 60                        | n.d.               | RT -> TMZ  | yes          | 1           | 1   |
| P12        | ZH121 | 40  | -      | M              | newly diagnosed      | partial     | 80                        | n.d.               | TMZ/RT→TMZ | yes          | 9           | 10  |
| P13        | ZH125 | 56  | -      | M              | newly diagnosed      | subtotal    | 90                        | yes                | n.d.       | n.d.         | 0           | 0+  |
| P14        | ZH129 | 65  | -      | M              | newly diagnosed      | partial     | 70                        | yes                | RT         | yes          | 3           | 12  |
| P15        | ZH130 | 62  | -      | M              | newly diagnosed      | subtotal    | 70                        | no                 | TMZ/RT→TMZ | yes          | 2           | 6   |
| P16        | ZH131 | 51  | -      | F              | newly diagnosed      | gross total | 100                       | n.d.               | TMZ        | yes          | 11          | 16+ |
| P17        | ZH133 | 1   | -      | M              | newly diagnosed      | gross total | n.d.                      | n.d.               | TMZ        | n.d.         | 47          | 47+ |
| P18        | ZH135 | 63  | -      | F              | newly diagnosed      | gross total | 80                        | no                 | n.d.       | yes          | 4           | 4   |
| P19        | ZH138 | 65  | -      | F              | newly diagnosed      | subtotal    | 90                        | no                 | RT         | yes          | 1           | 6   |
| P20        | ZH139 | 56  | -      | F              | newly diagnosed      | gross total | 80                        | n.d.               | TMZ/RT→TMZ | yes          | 43          | 52+ |
| P21        | ZH148 | 66  | -      | M              | newly diagnosed      | subtotal    | 60                        | no                 | RT         | yes          | 3           | 6   |
| P22        | ZH155 | 55  | -      | M              | newly diagnosed      | partial     | 60                        | weakly             | RT         | yes          | 2           | 11  |
| P23        | ZH156 | 81  | -      | F              | newly diagnosed      | subtotal    | 80                        | no                 | TMZ        | n.d.         | 3           | 3+  |
| P24_C      | ZH157 | 46  | -      | M              | newly diagnosed      | subtotal    | 80                        | no                 | TMZ/RT→TMZ | yes          | 5           | 19  |

|       |       |    |   |   |                 |             |    |        |                             |      |    |     |
|-------|-------|----|---|---|-----------------|-------------|----|--------|-----------------------------|------|----|-----|
| P25   | ZH161 | 55 | - | M | newly diagnosed | gross total | 90 | no     | TMZ/RT→TMZ                  | yes  | 11 | 22  |
| P26_D | ZH162 | 32 | - | F | newly diagnosed | subtotal    | 90 | n.d.   | RT                          | yes  | 9  | 34+ |
| P27_E | ZH164 | 67 | - | M | newly diagnosed | gross total | 90 | no     | TMZ/RT→TMZ                  | yes  | 8  | 26  |
| P28   | ZH165 | 51 | - | M | newly diagnosed | subtotal    | 70 | no     | TMZ/RT                      | yes  | 2  | 22  |
| P29   | ZH166 | 63 | - | M | newly diagnosed | subtotal    | 70 | n.d.   | no therapy                  | yes  | 2  | 2   |
| P30   | ZH168 | 52 | - | F | newly diagnosed | gross total | 90 | n.d.   | TMZ/RT→TMZ                  | yes  | 6  | 11  |
| P31   | ZH174 | 34 | - | F | newly diagnosed | gross total | 80 | no     | TMZ/RT→TMZ                  | n.d. | 46 | 46+ |
| P32   | ZH180 | 36 | - | F | newly diagnosed | gross total | 90 | weakly | Bevacizumab +<br>Irinotecan | yes  | 5  | 7   |
| P33   | ZH182 | 58 | - | M | newly diagnosed | subtotal    | 90 | no     | TMZ/RT→TMZ                  | yes  | 4  | 17  |
| P34   | ZH188 | 60 | - | F | newly diagnosed | subtotal    | 60 | n.d.   | TMZ/RT→TMZ                  | yes  | 4  | 5   |
| P35   | ZH194 | 60 | - | F | newly diagnosed | subtotal    | 70 | n.d.   | TMZ                         | yes  | 11 | 15  |
| P36   | ZH197 | 42 | - | M | newly diagnosed | gross total | 90 | n.d.   | RT                          | n.d. | 12 | 12+ |
| P37   | ZH200 | 68 | - | F | newly diagnosed | gross total | 90 | no     | TMZ/RT→TMZ                  | yes  | 5  | 14  |
| P38   | ZH204 | 60 | - | F | newly diagnosed | subtotal    | 70 | n.d.   | RT -> TMZ                   | yes  | 2  | 2   |
| P39   | ZH205 | 55 | - | M | newly diagnosed | partial     | 60 | no     | n.d.                        | n.d. | 1  | 1+  |
| P40   | ZH210 | 74 | - | M | newly diagnosed | subtotal    | 70 | yes    | TMZ/RT→TMZ                  | yes  | 4  | 7   |
| P41   | ZH221 | 41 | - | F | newly diagnosed | partial     | 50 | weakly | TMZ/RT                      | yes  | 3  | 38  |
| P42   | ZH229 | 66 | - | M | newly diagnosed | subtotal    | 70 | no     | TMZ/RT→TMZ                  | yes  | 4  | 8   |
| P43   | ZH231 | 55 | - | F | newly diagnosed | subtotal    | 70 | no     | TMZ/RT→TMZ                  | yes  | 6  | 8   |
| P44   | ZH232 | 37 | - | M | newly diagnosed | subtotal    | 90 | no     | TMZ/RT→TMZ                  | yes  | 3  | 10+ |
| P45   | ZH235 | 59 | - | M | newly diagnosed | subtotal    | 80 | n.d.   | no therapy                  | n.d. | 1  | 1+  |
| P46   | ZH241 | 61 | - | F | newly diagnosed | subtotal    | 90 | no     | RT -> TMZ                   | yes  | 6  | 14  |
| P47   | ZH242 | 56 | - | F | newly diagnosed | subtotal    | 70 | n.d.   | TMZ/RT→TMZ                  | yes  | 4  | 5+  |
| P48   | ZH250 | 36 | - | F | newly diagnosed | gross total | 80 | no     | TMZ/RT→TMZ                  | yes  | 8  | 15  |
| P49   | ZH253 | 69 | - | F | newly diagnosed | gross total | 70 | n.d.   | TMZ/RT→TMZ                  | yes  | 6  | 10+ |
| P50   | ZH255 | 64 | - | F | newly diagnosed | gross total | 90 | yes    | TMZ/RT→TMZ                  | yes  | 18 | 31+ |
| P51   | ZH256 | 72 | - | F | newly diagnosed | subtotal    | 80 | n.d.   | TMZ/RT→TMZ                  | yes  | 18 | 29+ |
| P52   | ZH264 | 61 | - | M | newly diagnosed | subtotal    | 80 | n.d.   | TMZ/RT→TMZ                  | yes  | 4  | 17  |
| P53   | ZH265 | 38 | - | F | newly diagnosed | subtotal    | 70 | n.d.   | TMZ/RT→TMZ                  | yes  | 5  | 17  |
| P54   | ZH273 | 35 | - | M | newly diagnosed | gross total | 80 | yes    | TMZ/RT→TMZ                  | yes  | 22 | 26+ |
| P55   | ZH275 | 74 | - | F | newly diagnosed | subtotal    | 60 | n.d.   | RT -> TMZ                   | yes  | 2  | 14  |

|       |       |      |    |   |                 |             |      |      |            |      |      |      |
|-------|-------|------|----|---|-----------------|-------------|------|------|------------|------|------|------|
| P56   | ZH280 | 85   | -  | F | newly diagnosed | partial     | 60   | n.d. | no therapy | yes  | 1    | 1    |
| P57   | ZH283 | 84   | -  | F | newly diagnosed | partial     | 60   | n.d. | RT         | yes  | 4    | 4    |
| P58   | ZH303 | 48   | -  | F | newly diagnosed | subtotal    | 90   | n.d. | TMZ/RT     | yes  | 3    | 15+  |
| P59   | ZH304 | 52   | -  | F | newly diagnosed | subtotal    | 70   | n.d. | TMZ/RT     | yes  | 1    | 10   |
| P60   | ZH315 | 67   | -  | M | newly diagnosed | n.d.        | n.d. | n.d. | n.d.       | n.d. | 1    | 1+   |
| P61   | ZH321 | 72   | -  | M | newly diagnosed | gross total | 80   | n.d. | RT         | yes  | 6    | 16+  |
| P62   | ZH326 | 71   | -  | M | newly diagnosed | partial     | 60   | n.d. | no therapy | yes  | 0    | 0    |
| P63   | ZH332 | 41   | -  | F | newly diagnosed | subtotal    | 70   | n.d. | TMZ/RT→TMZ | yes  | 5    | 18+  |
| P64   | ZH333 | 80   | -  | M | newly diagnosed | gross total | 90   | no   | RT         | yes  | 10   | 18+  |
| P65   | ZH49  | 59   | 60 | M | recurrent       | gross total | 90   | yes  | TMZ/RT→TMZ | yes  | 3    | 18   |
| P66_F | ZH50  | 18   | 19 | F | recurrent       | subtotal    | 90   | n.d. | RT         | yes  | 16   | 31   |
| P67   | ZH61  | 57   | 58 | M | recurrent       | subtotal    | 90   | no   | TMZ/RT→TMZ | yes  | 6    | 14+  |
| P4_A  | ZH86  | 57   | 57 | F | recurrent       | subtotal    | 70   | n.d. | TMZ/RT→TMZ | yes  | 6    | 10   |
| P68   | ZH87  | 34   | 37 | M | recurrent       | gross total | 90   | n.d. | RT         | yes  | 5    | 55   |
| P69   | ZH118 | 59   | 60 | M | recurrent       | subtotal    | 80   | n.d. | TMZ/RT→TMZ | yes  | 10   | 17   |
| P66_F | ZH124 | 18   | 20 | F | recurrent       | partial     | 80   | n.d. | RT         | yes  | 16   | 31   |
| P6_B  | ZH160 | 72   | 74 | F | recurrent       | gross total | 80   | n.d. | RT         | yes  | 12   | 29   |
| P24_C | ZH185 | 46   | 47 | M | recurrent       | subtotal    | 70   | no   | TMZ/RT→TMZ | yes  | 5    | 19   |
| P70   | ZH196 | 61   | 62 | M | recurrent       | subtotal    | 70   | n.d. | TMZ/RT     | yes  | 3    | 5    |
| P27_E | ZH208 | 67   | 68 | M | recurrent       | subtotal    | 100  | no   | TMZ/RT→TMZ | yes  | 8    | 26   |
| P71   | ZH245 | 32   | 34 | M | recurrent       | subtotal    | 100  | no   | TMZ/RT→TMZ | yes  | 16   | 17+  |
| P72   | ZH258 | 60   | 61 | M | recurrent       | gross total | 90   | no   | TMZ/RT→TMZ | yes  | 11   | 22   |
| P73   | ZH269 | n.d. | 59 | M | recurrent       | n.d.        | n.d. | n.d. | n.d.       | yes  | n.d. | n.d. |
| P26_D | ZH276 | 32   | 34 | F | recurrent       | gross total | 80   | n.d. | RT         | yes  | 9    | 34+  |
| P74   | ZH297 | 39   | 51 | M | recurrent       | subtotal    | 80   | n.d. | RT -> TMZ  | yes  | 141  | 159+ |

n.d., no data; M, male; F, female; RT, radiotherapy; TMZ, temozolomide; PD, progressive disease; PFS, progression-free survival; OS, overall survival; KPS, Karnofsky performance status; MGMT, O<sup>6</sup>-methylguanyl-DNA-methyltransferase, + indicates patients who are deceased; \* data are reported from first surgery; ° data are reported from the date of surgery tissue was obtained; A-F indicate patients with two tissue samples in the analysis.

**Supplementary Table 3: Correlation analyses for newly diagnosed patients (upper right) and recurrent patients (lower left).**

|                                                       | TGF- $\beta$ <sub>1</sub> mRNA | TGF- $\beta$ <sub>2</sub> mRNA | TGF- $\beta$ <sub>3</sub> mRNA | TGF- $\beta$ <sub>1</sub> protein IHC | TGF- $\beta$ <sub>2</sub> protein IHC | TGF- $\beta$ <sub>3</sub> protein IHC | pSmad2 protein IHC             | pSmad 1/5/8 protein IHC        | PDGF-B mRNA                    | PAI-1 mRNA                     | PAI-1 protein IHC              | Ki-67 protein IHC              |
|-------------------------------------------------------|--------------------------------|--------------------------------|--------------------------------|---------------------------------------|---------------------------------------|---------------------------------------|--------------------------------|--------------------------------|--------------------------------|--------------------------------|--------------------------------|--------------------------------|
| <b>TGF-<math>\beta</math><sub>1</sub> mRNA</b>        |                                | r = 0.55<br>p < 0.001<br>***   | r = 0.74<br>p < 0.001<br>***   | r = 0.08<br>p = 0.579<br>n.s.         | r = 0.14<br>p = 0.285<br>n.s.         | r = -0.03<br>p = 0.818<br>n.s.        | r = 0.00<br>p = 0.990<br>n.s.  | r = 0.00<br>p = 0.994<br>n.s.  | r = 0.78<br>p < 0.001<br>***   | r = 0.54<br>p < 0.001<br>***   | r = 0.06<br>p = 0.714<br>n.s.  | r = -0.19<br>p = 0.146<br>n.s. |
| <b>TGF-<math>\beta</math><sub>2</sub> mRNA</b>        | r = 0.52<br>p = 0.039<br>*     |                                | r = 0.46<br>p < 0.001<br>***   | r = 0.06<br>p = 0.682<br>n.s.         | r = 0.00<br>p = 0.992<br>n.s.         | r = -0.04<br>p = 0.784<br>n.s.        | r = -0.01<br>p = 0.940<br>n.s. | r = 0.03<br>p = 0.824<br>n.s.  | r = 0.42<br>p < 0.001<br>***   | r = 0.39<br>p = 0.001<br>**    | r = -0.03<br>p = 0.839<br>n.s. | r = -0.04<br>p = 0.770<br>n.s. |
| <b>TGF-<math>\beta</math><sub>3</sub> mRNA</b>        | r = 0.83<br>p < 0.001<br>***   | r = 0.59<br>p = 0.015<br>*     |                                | r = 0.04<br>p = 0.791<br>n.s.         | r = -0.02<br>p = 0.897<br>n.s.        | r = -0.11<br>p = 0.422<br>n.s.        | r = -0.01<br>p = 0.993<br>n.s. | r = -0.13<br>p = 0.351<br>n.s. | r = 0.73<br>p < 0.001<br>***   | r = 0.36<br>p = 0.004<br>**    | r = -0.18<br>p = 0.254<br>n.s. | r = -0.03<br>p = 0.812<br>n.s. |
| <b>TGF-<math>\beta</math><sub>1</sub> protein IHC</b> | r = -0.64<br>p = 0.076<br>n.s. | r = -0.51<br>p = 0.162<br>n.s. | r = -0.61<br>p = 0.086<br>n.s. |                                       | r = 0.10<br>p = 0.453<br>n.s.         | r = 0.18<br>p = 0.177<br>n.s.         | r = 0.11<br>p = 0.413<br>n.s.  | r = 0.44<br>p < 0.001<br>***   | r = 0.03<br>p = 0.81<br>n.s.   | r = 0.17<br>p = 0.213<br>n.s.  | r = 0.26<br>p = 0.096<br>n.s.  | r = -0.19<br>p = 0.159<br>n.s. |
| <b>TGF-<math>\beta</math><sub>2</sub> protein IHC</b> | r = -0.20<br>p = 0.613<br>n.s. | r = -0.27<br>p = 0.493<br>n.s. | r = -0.33<br>p = 0.385<br>n.s. | r = 0.32<br>p = 0.410<br>n.s.         |                                       | r = 0.22<br>p = 0.099<br>n.s.         | r = -0.06<br>p = 0.676<br>n.s. | r = 0.08<br>p = 0.584<br>n.s.  | r = 0.14<br>p = 0.293<br>n.s.  | r = 0.21<br>p = 0.109<br>n.s.  | r = 0.12<br>p = 0.435<br>n.s.  | r = -0.17<br>p = 0.207<br>n.s. |
| <b>TGF-<math>\beta</math><sub>3</sub> protein IHC</b> | r = -0.38<br>p = 0.313<br>n.s. | r = -0.27<br>p = 0.493<br>n.s. | r = -0.50<br>p = 0.178<br>n.s. | r = 0.29<br>p = 0.437<br>n.s.         | r = 0.67<br>p = 0.06<br>n.s.          |                                       | r = -0.06<br>p = 0.638<br>n.s. | r = 0.16<br>p = 0.253<br>n.s.  | r = 0.08<br>p = 0.570<br>n.s.  | r = 0.19<br>p = 0.164<br>n.s.  | r = 0.07<br>p = 0.659<br>n.s.  | r = -0.10<br>p = 0.453<br>n.s. |
| <b>pSmad2 protein IHC</b>                             | r = -0.49<br>p = 0.155<br>n.s. | r = -0.67<br>p = 0.039<br>*    | r = -0.67<br>p = 0.039<br>*    | r = 0.71<br>p = 0.037<br>*            | r = 0.42<br>p = 0.27<br>n.s.          | r = 0.32<br>p = 0.410<br>n.s.         |                                | r = 0.14<br>p = 0.306<br>n.s.  | r = 0.15<br>p = 0.245<br>n.s.  | r = -0.15<br>p = 0.242<br>n.s. | r = 0.17<br>p = 0.264<br>n.s.  | r = 0.18<br>p = 0.171<br>n.s.  |
| <b>pSmad 1/5/8 protein IHC</b>                        | r = -0.51<br>p = 0.162<br>n.s. | r = -0.72<br>p = 0.031<br>*    | r = -0.51<br>p = 0.162<br>n.s. | r = 0.79<br>p = 0.028<br>*            | r = 0.36<br>p = 0.389<br>n.s.         | r = 0.43<br>p = 0.299<br>n.s.         | r = 0.54<br>p = 0.133<br>n.s.  |                                | r = -0.08<br>p = 0.549<br>n.s. | r = 0.01<br>p = 0.962<br>n.s.  | r = 0.15<br>p = 0.342<br>n.s.  | r = -0.35<br>p = 0.008<br>**   |
| <b>PDGF-B mRNA</b>                                    | r = 0.62<br>p = 0.011<br>*     | r = 0.32<br>p = 0.226<br>n.s.  | r = 0.46<br>p = 0.072<br>n.s.  | r = -0.7<br>p = 0.043<br>*            | r = 0.32<br>p = 0.410<br>n.s.         | r = 0.18<br>p = 0.644<br>n.s.         | r = -0.32<br>p = 0.368<br>n.s. | r = -0.51<br>p = 0.162<br>n.s. |                                | r = 0.32<br>p = 0.009<br>**    | r = -0.23<br>p = 0.133<br>n.s. | r = -0.16<br>p = 0.228<br>n.s. |
| <b>PAI-1 mRNA</b>                                     | r = 0.54<br>p = 0.033<br>*     | r = 0.31<br>p = 0.24<br>n.s.   | r = 0.32<br>p = 0.226<br>n.s.  | r = -0.02<br>p = 0.982<br>n.s.        | r = -0.13<br>p = 0.744<br>n.s.        | r = 0.22<br>p = 0.581<br>n.s.         | r = 0.33<br>p = 0.349<br>n.s.  | r = -0.14<br>p = 0.708<br>n.s. | r = 0.37<br>p = 0.158<br>n.s.  |                                | r = 0.32<br>p = 0.036<br>*     | r = -0.13<br>p = 0.351<br>n.s. |
| <b>PAI-1 protein IHC</b>                              | r = 0.3<br>p = 0.498<br>n.s.   | r = 0.3<br>p = 0.498<br>n.s.   | r = 0.04<br>p = 0.964<br>n.s.  | r = -0.04<br>p = 0.964<br>n.s.        | r = 0.33<br>p = 0.444<br>n.s.         | r = 0.07<br>p = 0.906<br>n.s.         | r = 0.3<br>p = 0.498<br>n.s.   | r = 0.31<br>p = 0.564<br>n.s.  | r = 0.15<br>p = 0.784<br>n.s.  | r = 0.3<br>p = 0.498<br>n.s.   |                                | r = -0.02<br>p = 0.893<br>n.s. |
| <b>Ki-67 protein IHC</b>                              | r = 0.20<br>p = 0.613<br>n.s.  | r = 0.37<br>p = 0.336<br>n.s.  | r = 0.28<br>p = 0.463<br>n.s.  | r = 0.21<br>p = 0.619<br>n.s.         | r = -0.31<br>p = 0.462<br>n.s.        | r = -0.33<br>p = 0.428<br>n.s.        | r = -0.20<br>p = 0.613<br>n.s. | r = -0.24<br>p = 0.582<br>n.s. | r = -0.18<br>p = 0.644<br>n.s. | r = -0.52<br>p = 0.236<br>n.s. | r = -0.52<br>p = 0.236<br>n.s. |                                |

Statistical significances of p < 0.05 (\*), p < 0.01 (\*\*) and p < 0.001 (\*\*\*) were determined using the two-tailed Spearman correlation test (r, correlation coefficient). mRNA, messenger ribonucleic acid, IHC, immunohistochemistry, n.s., not significant.

**Supplementary Table 4: TGF- $\beta$  pathway activity and age.**

|                        | Age                    |
|------------------------|------------------------|
| TGF- $\beta_1$ mRNA    | r=0.15, p=0.240, n.s.  |
| TGF- $\beta_2$ mRNA    | r=0.33, p=0.009, **    |
| TGF- $\beta_3$ mRNA    | r=0.26, p=0.045, *     |
| TGF- $\beta_1$ protein | r=0.03, p=0.817, n.s.  |
| TGF- $\beta_2$ protein | r=-0.12, p=0.368, n.s. |
| TGF- $\beta_3$ protein | r=-0.14, p=0.314, n.s. |
| pSmad2 protein         | r=0.06, p=0.661, n.s.  |
| pSmad1/5/8 protein     | r=-0.17, p=0.204, n.s. |
| PDGF-B mRNA            | r=0.09, p=0.472, n.s.  |
| PAI-1 mRNA             | r=0.26, p=0.044, *     |
| PAI-1 protein          | r=-0.1, p=0.524, n.s.  |
| Ki-67 protein          | r=0.09, p=0.492, n.s.  |

Correlation analyses were performed in the group of newly diagnosed glioblastoma patients. Statistical significances of  $p < 0.05$  (\*) and  $p < 0.01$  (\*\*) were determined using the two-tailed Spearman correlation test (r, correlation coefficient). mRNA, messenger ribonucleic acid, n.s., not significant.

# SUPPLEMENTARY FIGURES

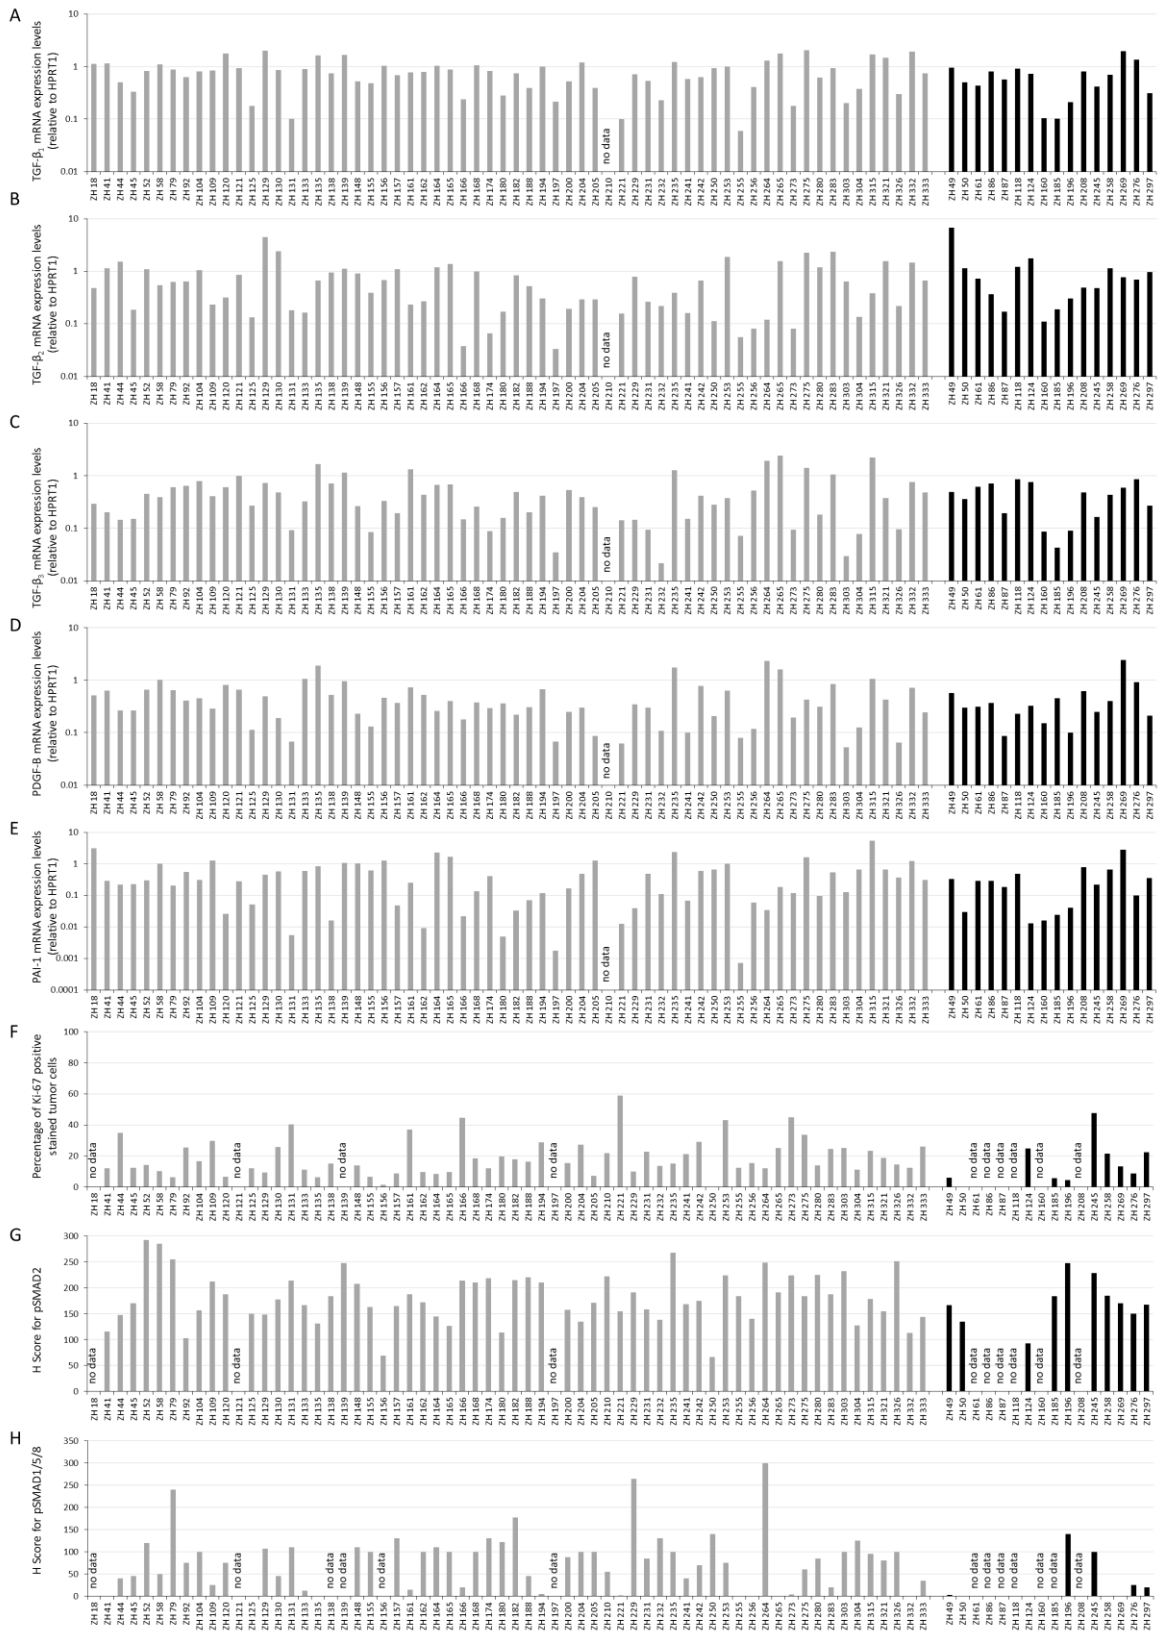

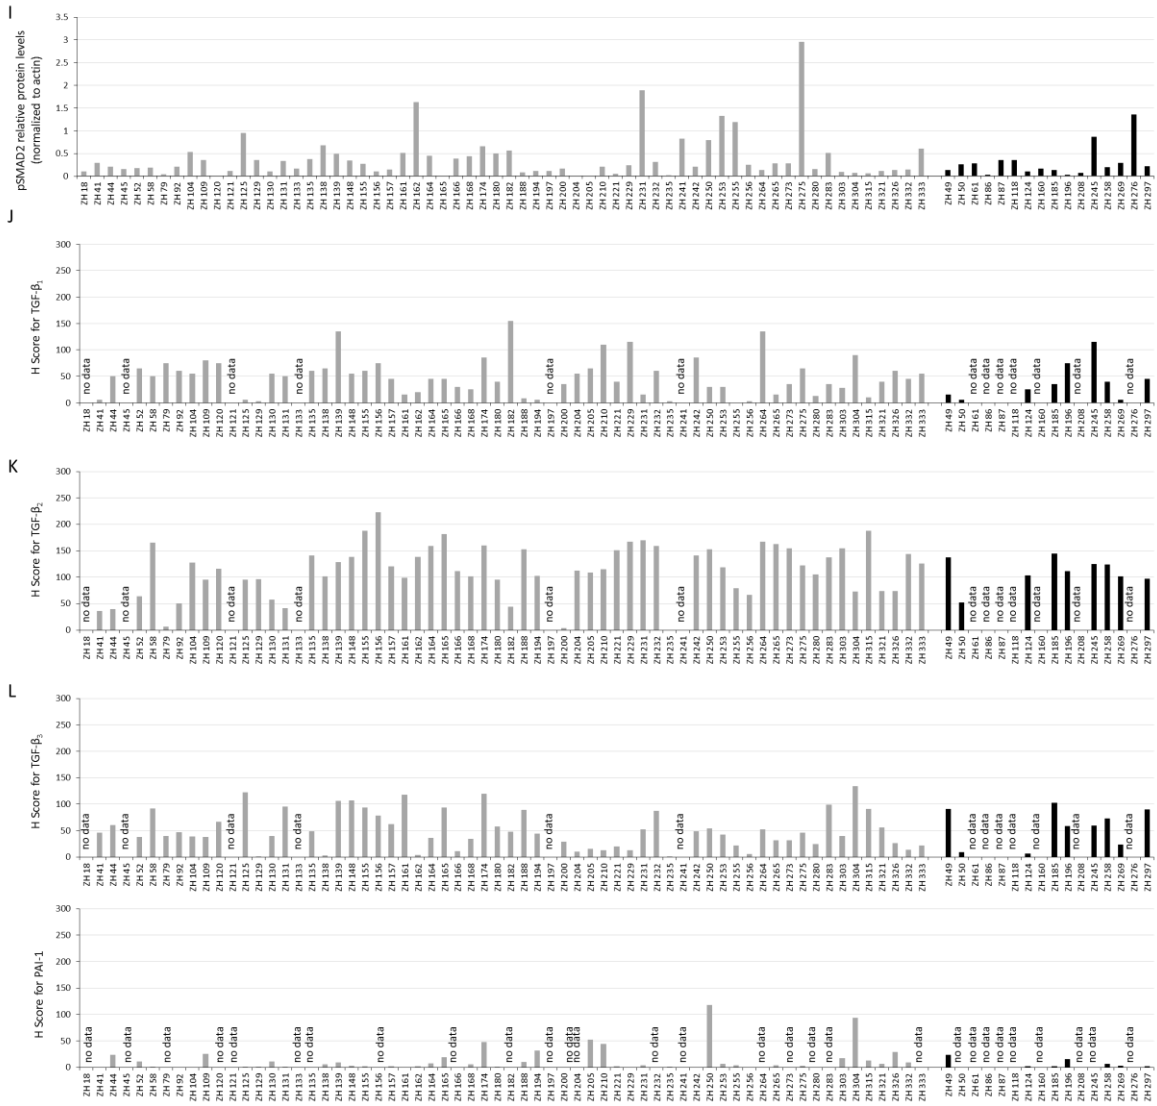

**Supplementary Figure 1: TGF- $\beta$ -related candidate biomarker determination in glioblastoma tissue.** Relative mRNA expression levels were assessed for TGF- $\beta_1$  (A), TGF- $\beta_2$  (B), TGF- $\beta_3$  (C), PDGF-B (D) and PAI-1 (E) using hypoxanthine-guanine phosphoribosyltransferase1 (HPRT1) as a reference. Values are represented in a logarithmic scale. Grey bars show newly diagnosed and black bars recurrent glioblastoma patients. Protein levels were assessed by immunohistochemistry. The percentage of positive tumor cells was assessed for Ki-67 (F) and H scores were assessed for TGF- $\beta_1$  (G), TGF- $\beta_2$  (H), TGF- $\beta_3$  (I), pSmad2 (J), pSmad1/5/8 (K) and PAI-1 (L). Grey bars show newly diagnosed, black bars show recurrent glioblastoma patients



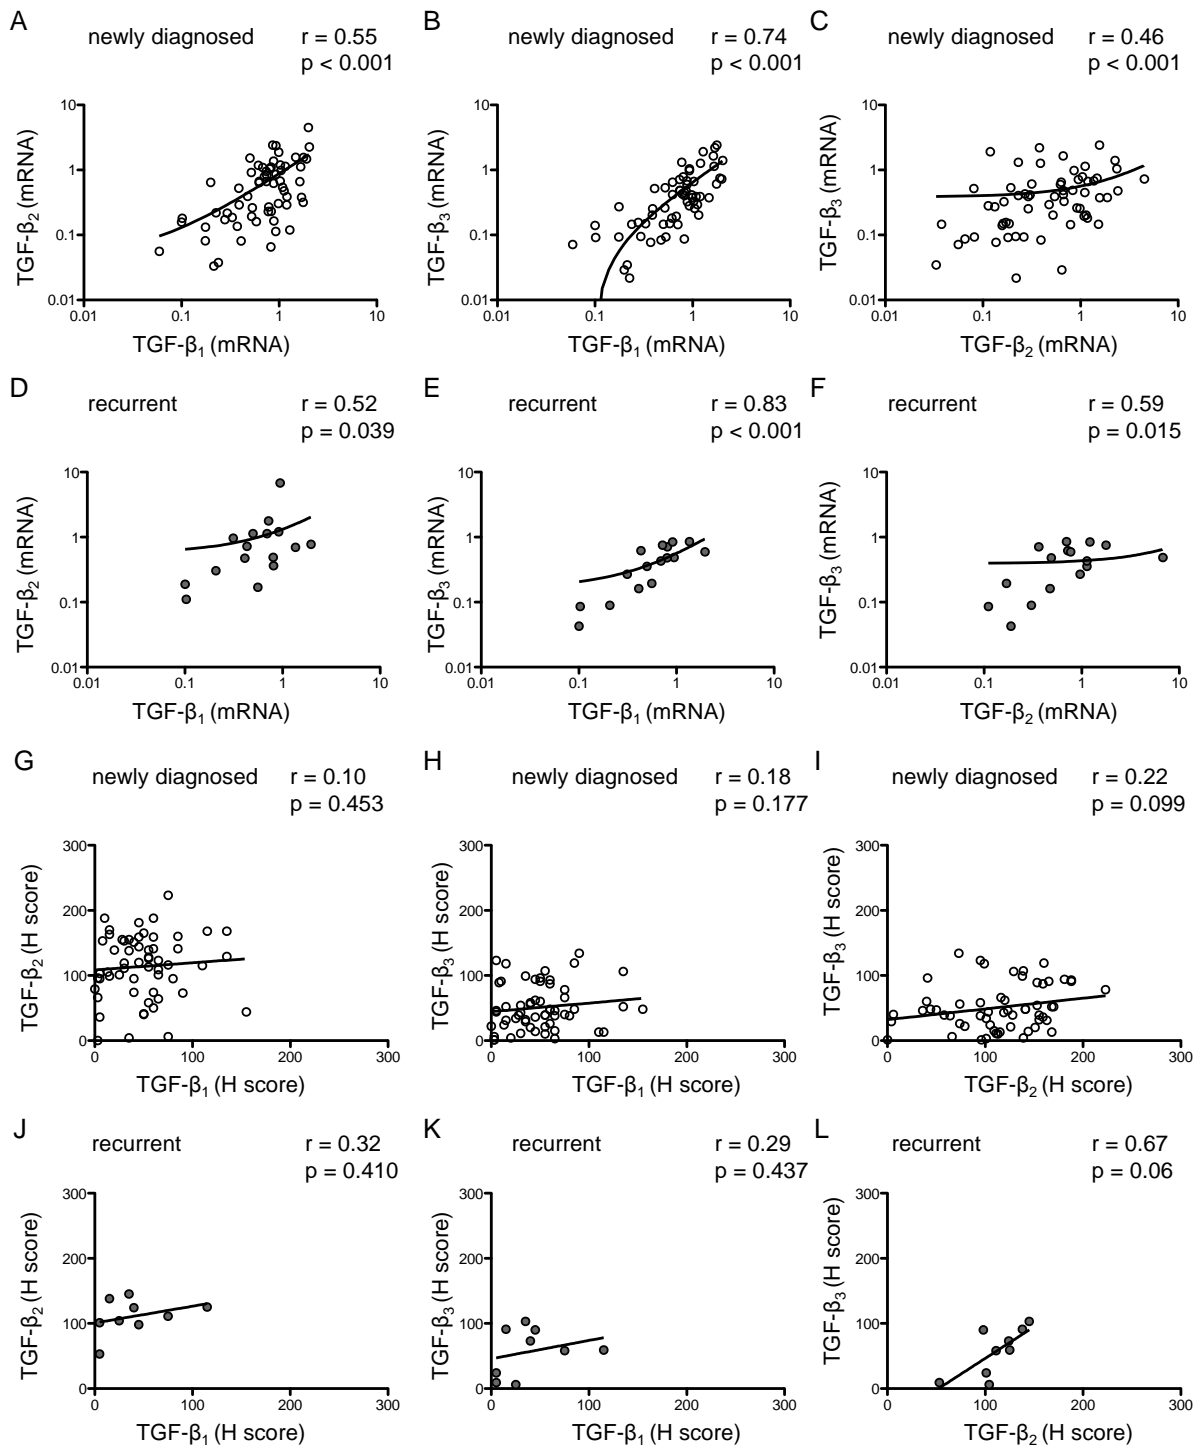

**Supplementary Figure 2: Correlation of TGF- $\beta$  isoform expression in the subgroups of newly diagnosed or recurrent glioblastomas.**

Correlation of mRNA data of TGF- $\beta_1$  and TGF- $\beta_2$  (A,D), of TGF- $\beta_1$  and TGF- $\beta_3$  (B,E) and of TGF- $\beta_2$  and TGF- $\beta_3$  (C,F) is shown for the patient subgroups of newly diagnosed patients (A-C) and recurrent patients (D-F). Values are represented in a logarithmic scale. Correlation of protein data of TGF- $\beta_1$  and TGF- $\beta_2$  (G,J), of TGF- $\beta_1$  and TGF- $\beta_3$  (H,K) and of TGF- $\beta_2$  and TGF- $\beta_3$  (I,L) is shown for the patient subgroups of newly diagnosed patients (G-I) and recurrent patients (J-L). Values are represented in a linear scale. Two-tailed Spearman test coefficients ( $r$ ) and significances ( $p$ ) are indicated (open circles, newly diagnosed; closed circles, recurrent tumor specimens).

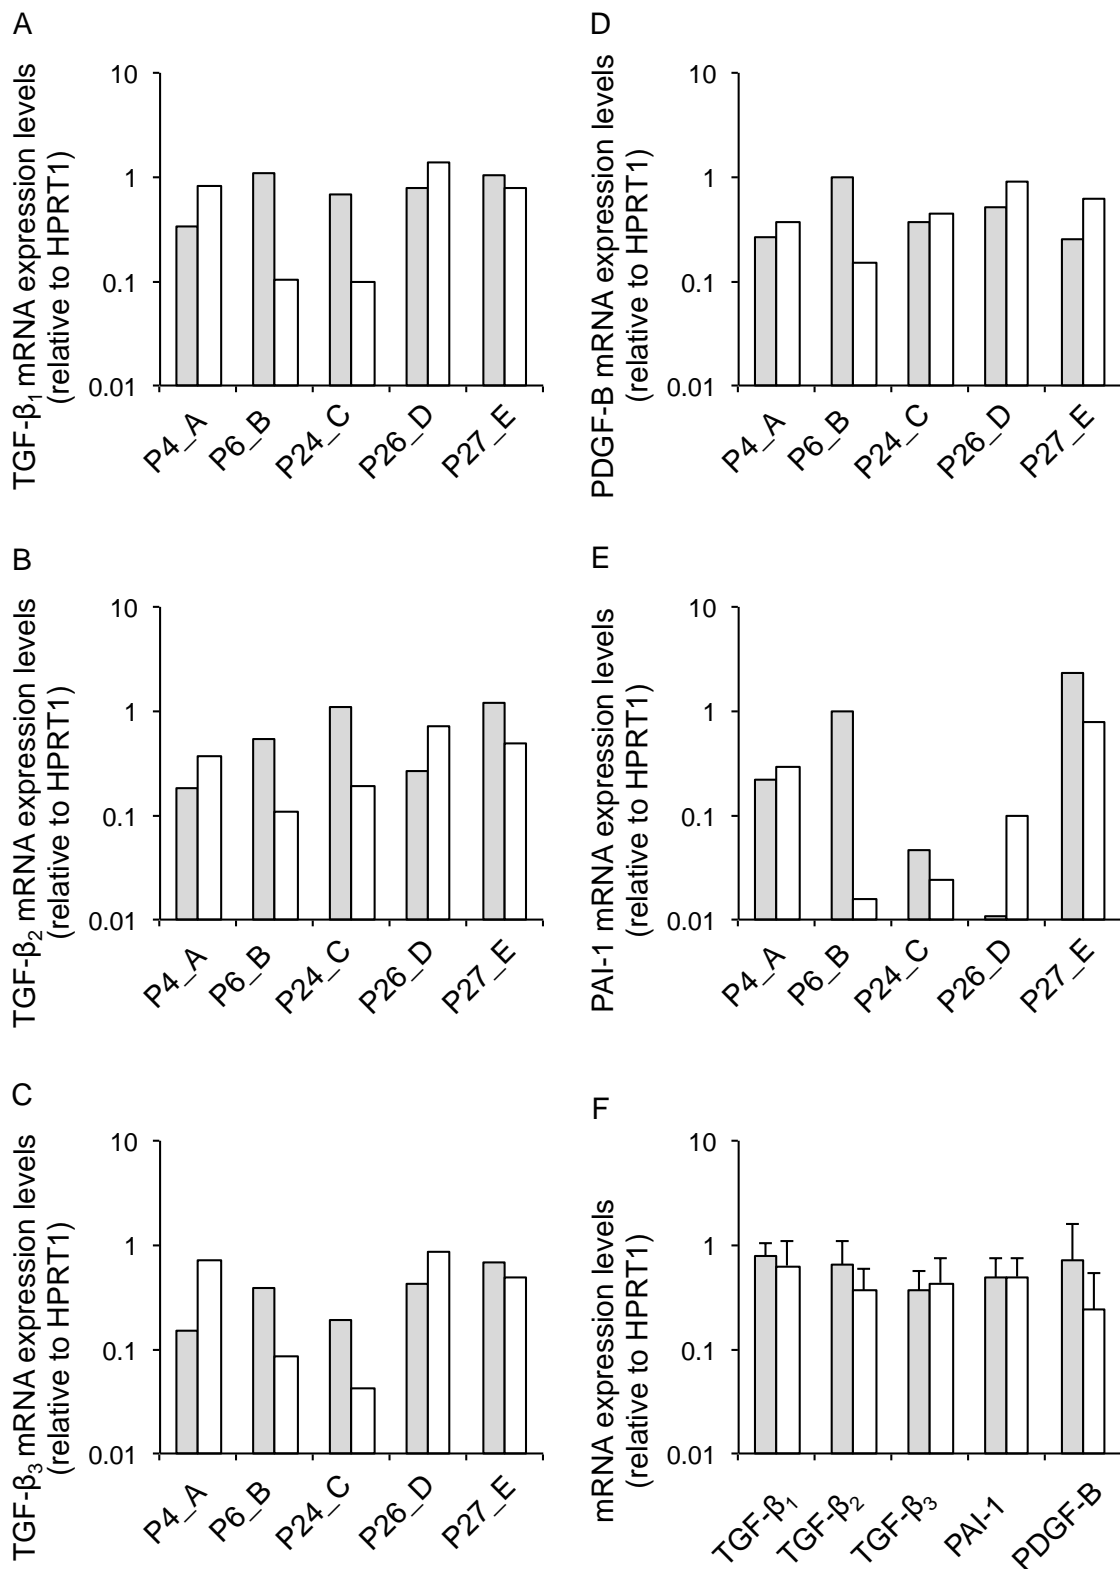

**Supplementary Figure 3:** mRNA expression in paired glioblastoma (newly diagnosed and recurrent). TGF- $\beta_1$  (A), TGF- $\beta_2$  (B), TGF- $\beta_3$  (C), PDGF-B (D) and PAI-1 (E) mRNA expression levels are shown for primary (grey bars) and recurrent (white bars) tumor specimens of 5 individual glioblastoma patients. Values are represented in a logarithmic scale. F, Pooled mRNA expression levels of the five patients are shown for the target genes. Analysis of significance was carried out using the two-tailed Student's *t*-test. Patient tissues of primary and recurrent tumor: P4\_A (ZH 45 and ZH 86), P6\_B (ZH 58 and ZH 160), P24\_C (ZH 157 and ZH 185), P26\_D (ZH 162 and ZH 276), P27\_E (ZH 164 and ZH 208).

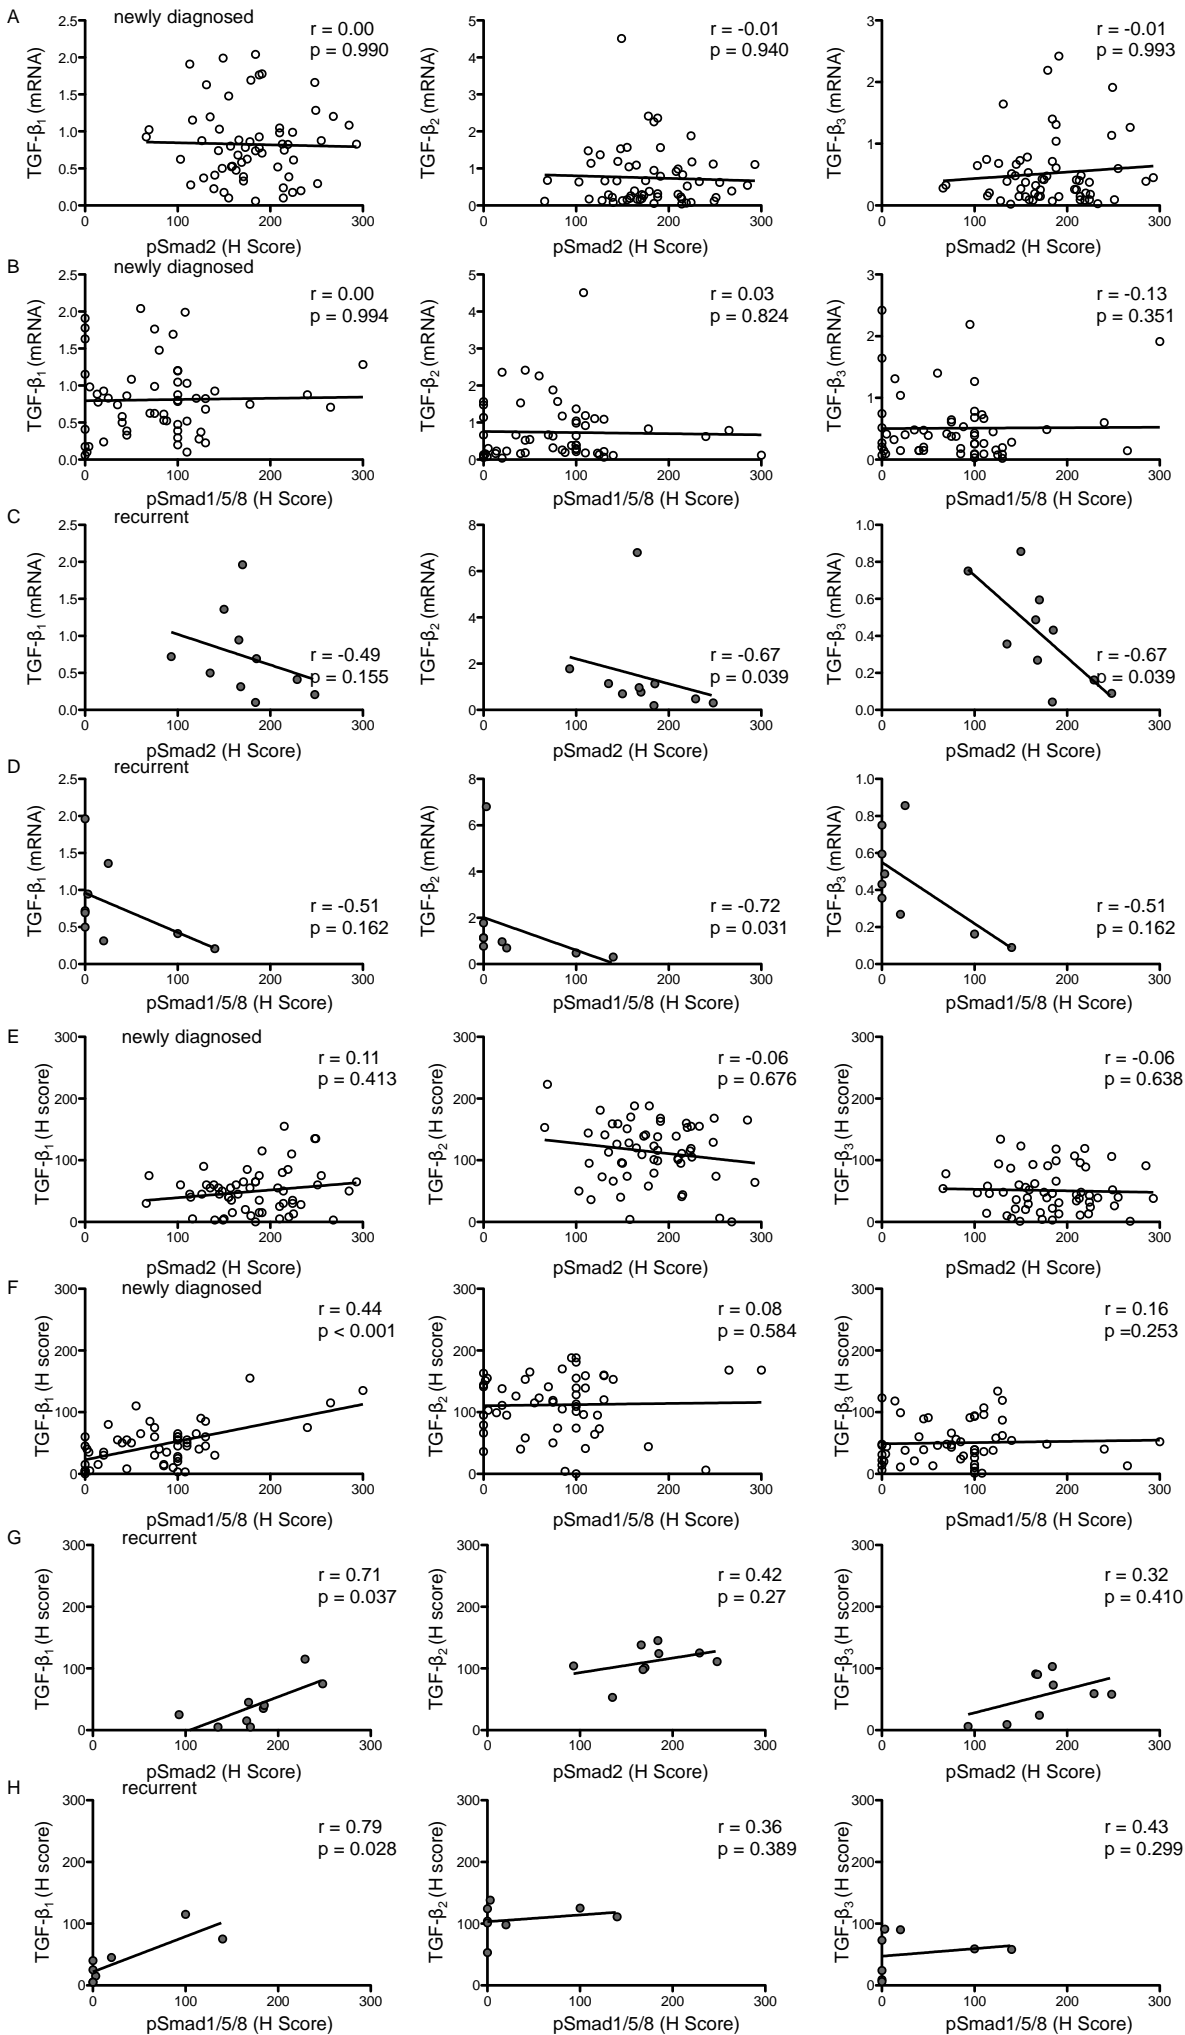

**Supplementary Figure 4:** *Assessment of TGF- $\beta$  pathway activation in glioblastoma: Smad phosphorylation in the subgroups of newly diagnosed or recurrent glioblastomas.*

A-D, Correlation of mRNA data of TGF- $\beta_1$  or TGF- $\beta_2$  or TGF- $\beta_3$  and pSmad2 (A,C) or pSmad1/5/8 (B,D) for newly diagnosed patients (A,B) or recurrent patients (C,D). E-H, Correlation of protein data of TGF- $\beta_1$  or TGF- $\beta_2$  or TGF- $\beta_3$  and pSmad2 (E,G) or pSmad1/5/8 (F,H) for newly diagnosed patients (E,F) or recurrent patients (G,H). Values are represented in a linear scale. Two-tailed Spearman test coefficients (r) and significances (p) are indicated (open circles, newly diagnosed; closed circles, recurrent tumor specimens).

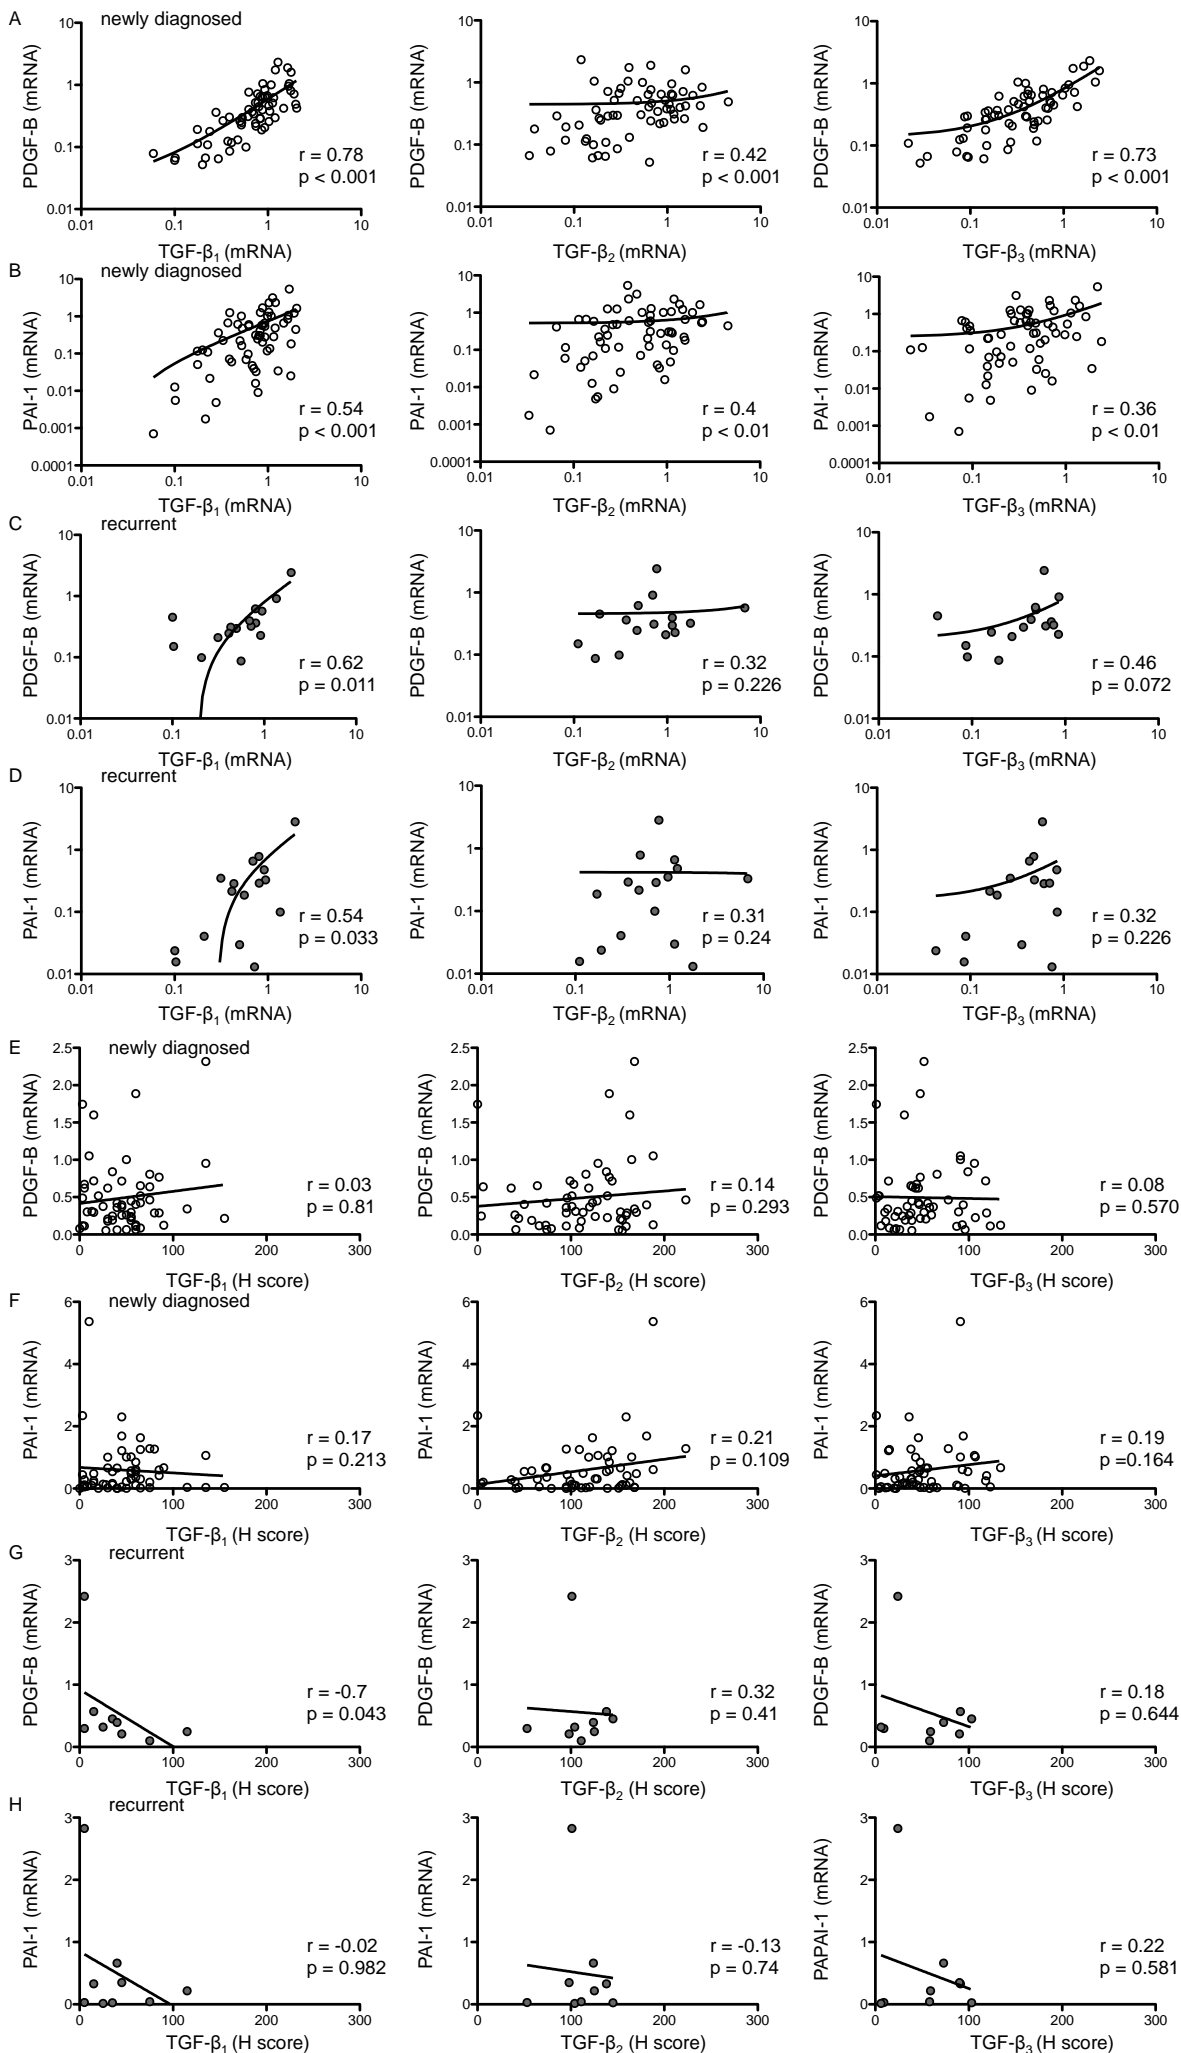

**Supplementary Figure 5:** *Assessment of TGF- $\beta$  pathway activation in glioblastoma: expression of TGF- $\beta$  response genes in the subgroups of newly diagnosed or recurrent glioblastomas.*

A-D, Correlation of mRNA data of TGF- $\beta_1$  or TGF- $\beta_2$  or TGF- $\beta_3$  and PDGF-B (A,C) or PAI-1 (B,D) for newly diagnosed patients (A,B) or recurrent patients (C,D). Values are represented in a logarithmic scale. E-H, Correlation of protein data of TGF- $\beta_1$  or TGF- $\beta_2$  or TGF- $\beta_3$  and PDGF-B (E,G) or PAI-1 (F,H) for newly diagnosed patients (E,F) or recurrent patients (G,H). Values are represented in a linear scale. Two-tailed Spearman test coefficients ( $r$ ) and significances ( $p$ ) are indicated (open circles, newly diagnosed; closed circles, recurrent tumor specimens).

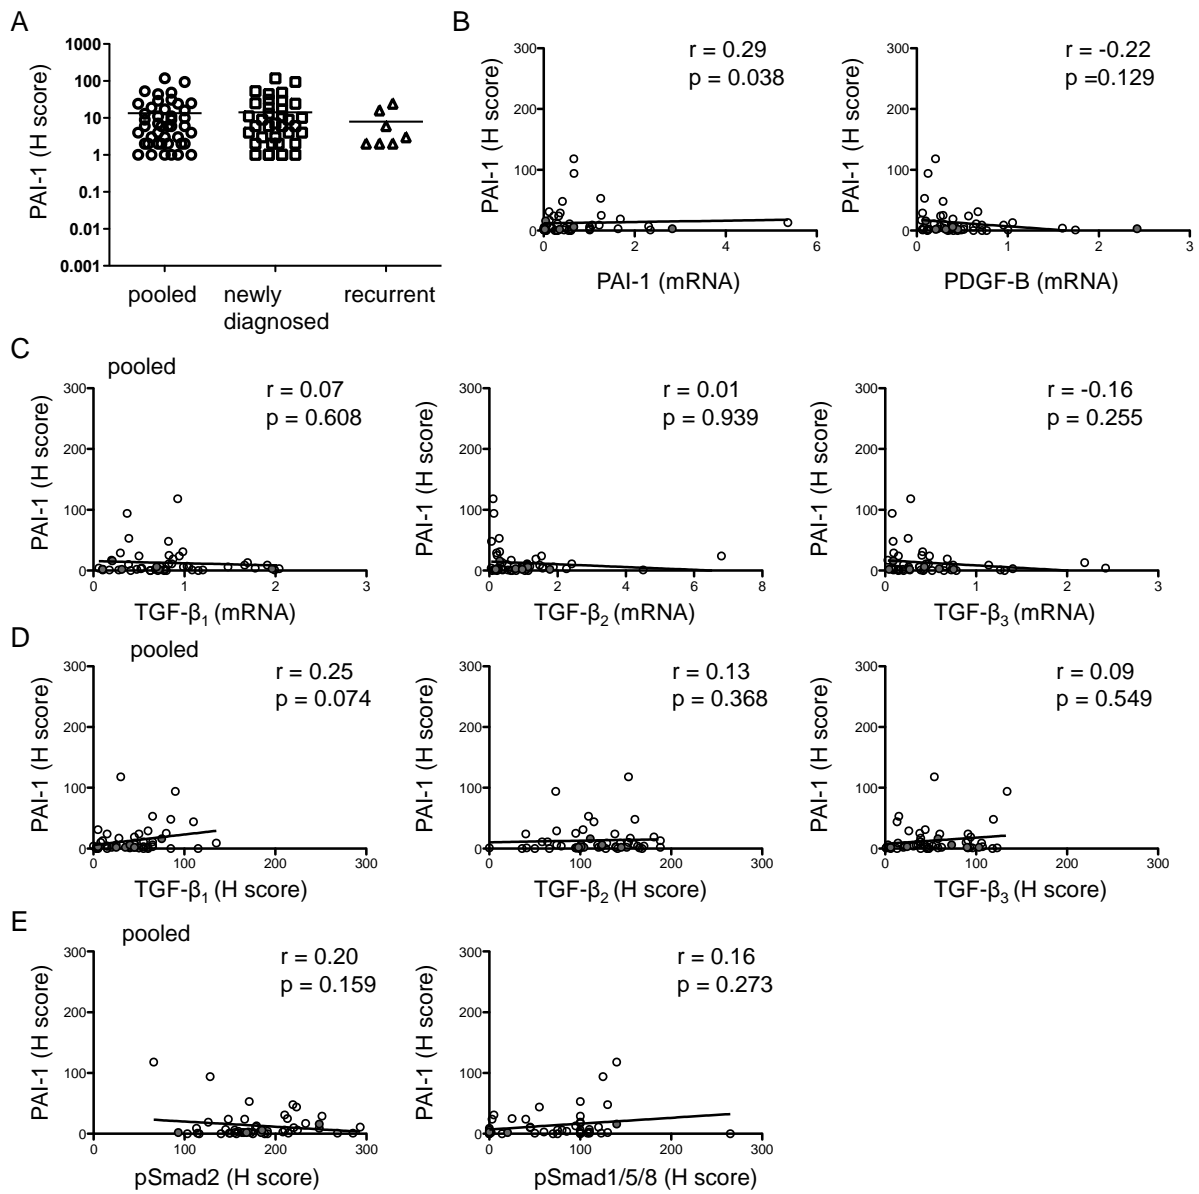

**Supplementary Figure 6: Assessment of TGF- $\beta$  pathway activation in glioblastoma: PAI-1 protein levels.**

A, PAI-1 protein levels were assessed by immunohistochemistry and median H Scores are shown for all patients pooled, newly diagnosed tumor tissues or recurrent tumor tissues separately. The black bar marks the mean in each group. Correlation is shown for the H scores of PAI-1 and mRNA expression levels of PAI-1 or PDGF-B (B) for all samples pooled. (B) Pairwise correlation analyses of PAI-1 protein levels and TGF- $\beta$  isoform mRNA (C) or protein (D) levels are shown for all samples pooled. Correlation is shown for the H scores of PAI-1 and pSmad2 or pSmad1/5/8 (E) for all samples pooled. Two-tailed Spearman test coefficients ( $r$ ) and significances ( $p$ ) are indicated (open circles, newly diagnosed; closed circles, recurrent).

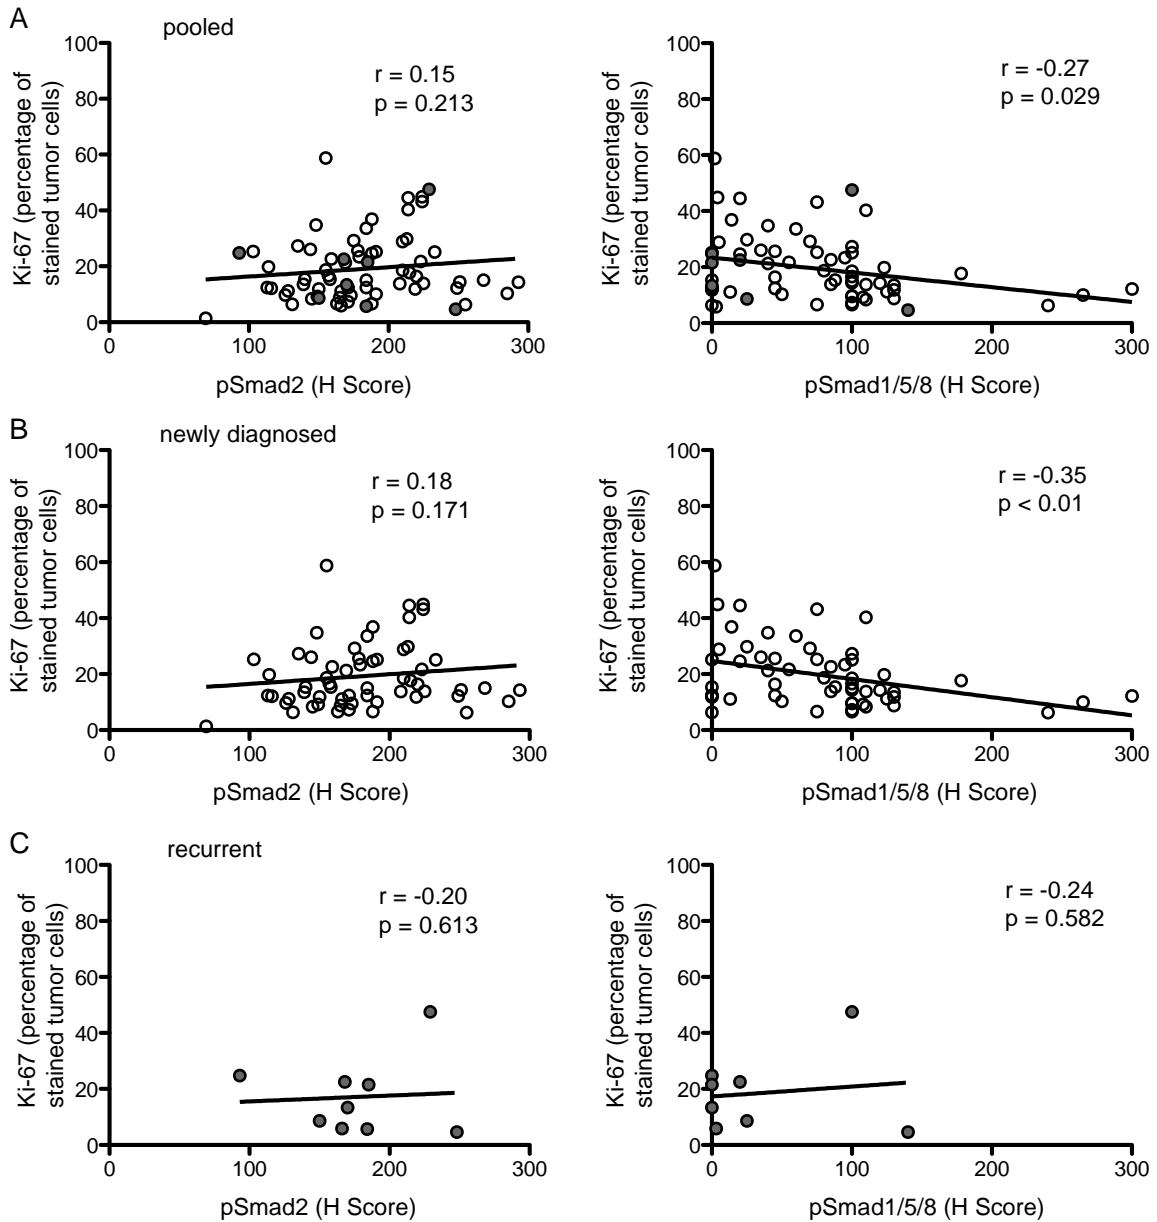

**Supplementary Figure 7: Correlation of pSmad2 or pSmad1/5/8 and Ki-67.**

Correlation analyses of protein data of pSmad2 or pSmad1/5/8 and Ki-67 were assessed for all patients pooled (A), newly diagnosed patients (B) or recurrent patients (C). Values are represented in a linear scale. Two-tailed Spearman test coefficients ( $r$ ) and significances ( $p$ ) are indicated (open circles, newly diagnosed; closed circles, recurrent tumor specimens).



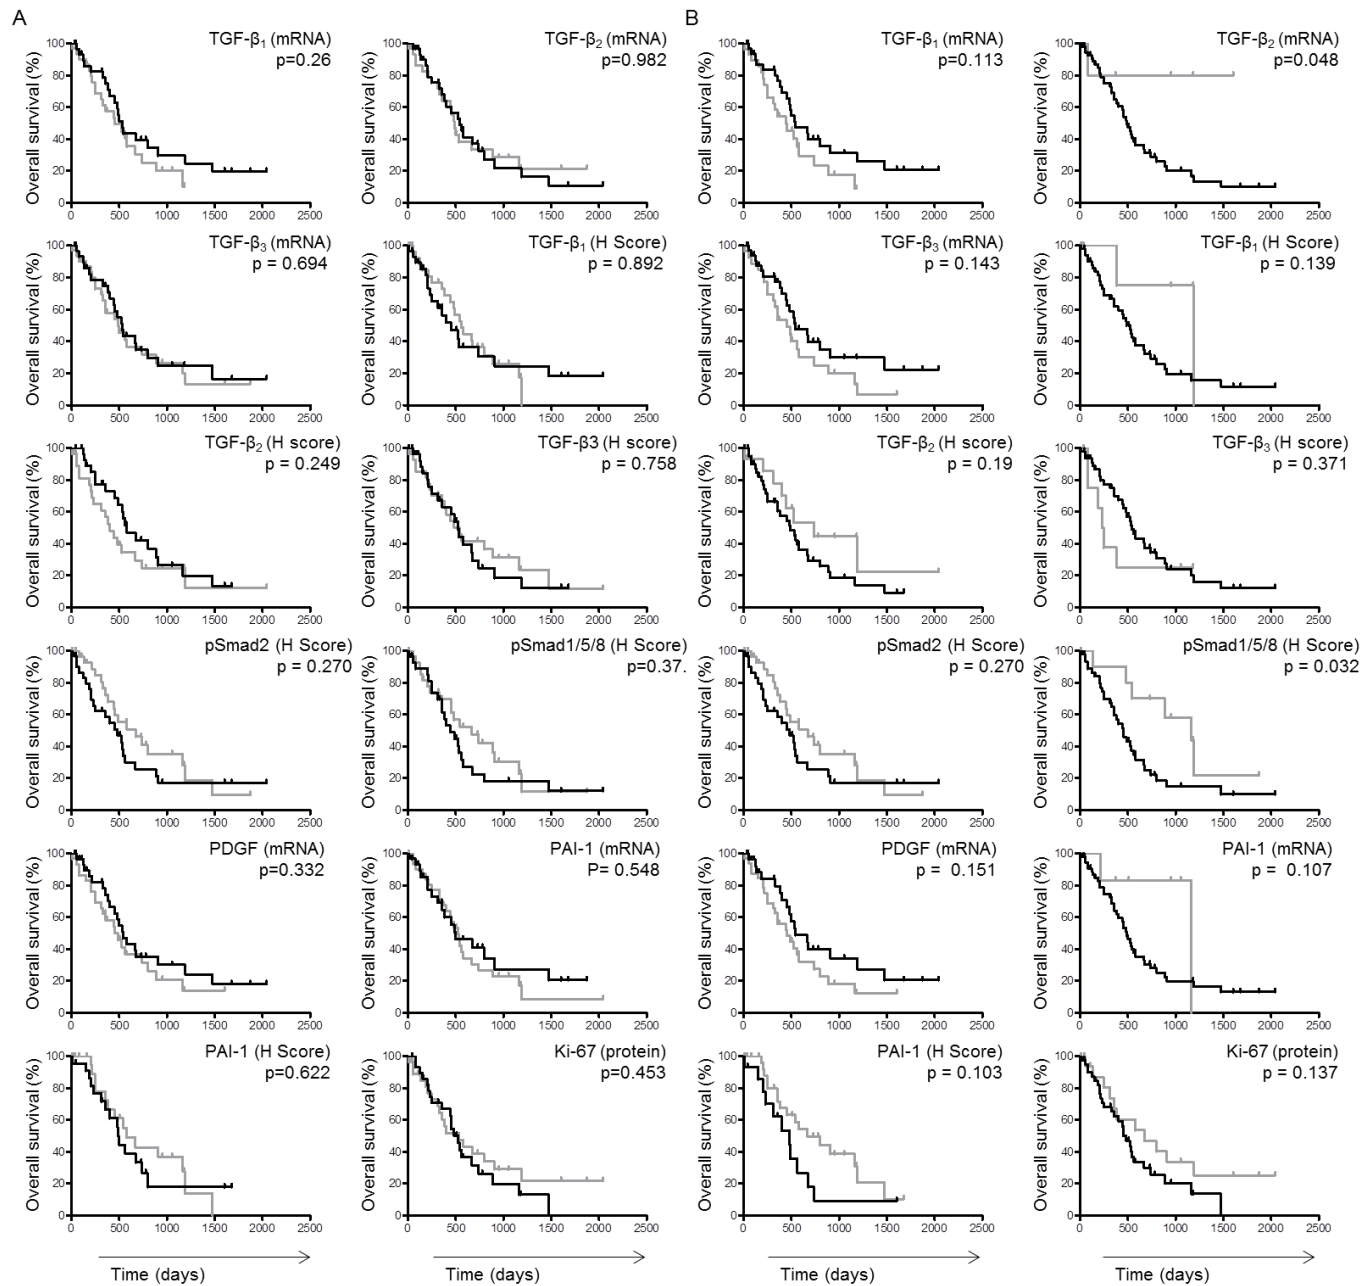

**Supplementary Figure 8: *TGF-β* pathway activity and outcome.** Kaplan-Meier survival curves of overall survival are shown for newly diagnosed glioblastomas. Patients were divided into two groups with high (black) or low (grey) expression of the target gene or target protein. The cut-off was defined by the median mRNA expression level of the target (A) or the expression level that results in the highest impact on survival (B). Statistical significances (p) were determined using the log-rank test (p< 0.05 was considered significant).

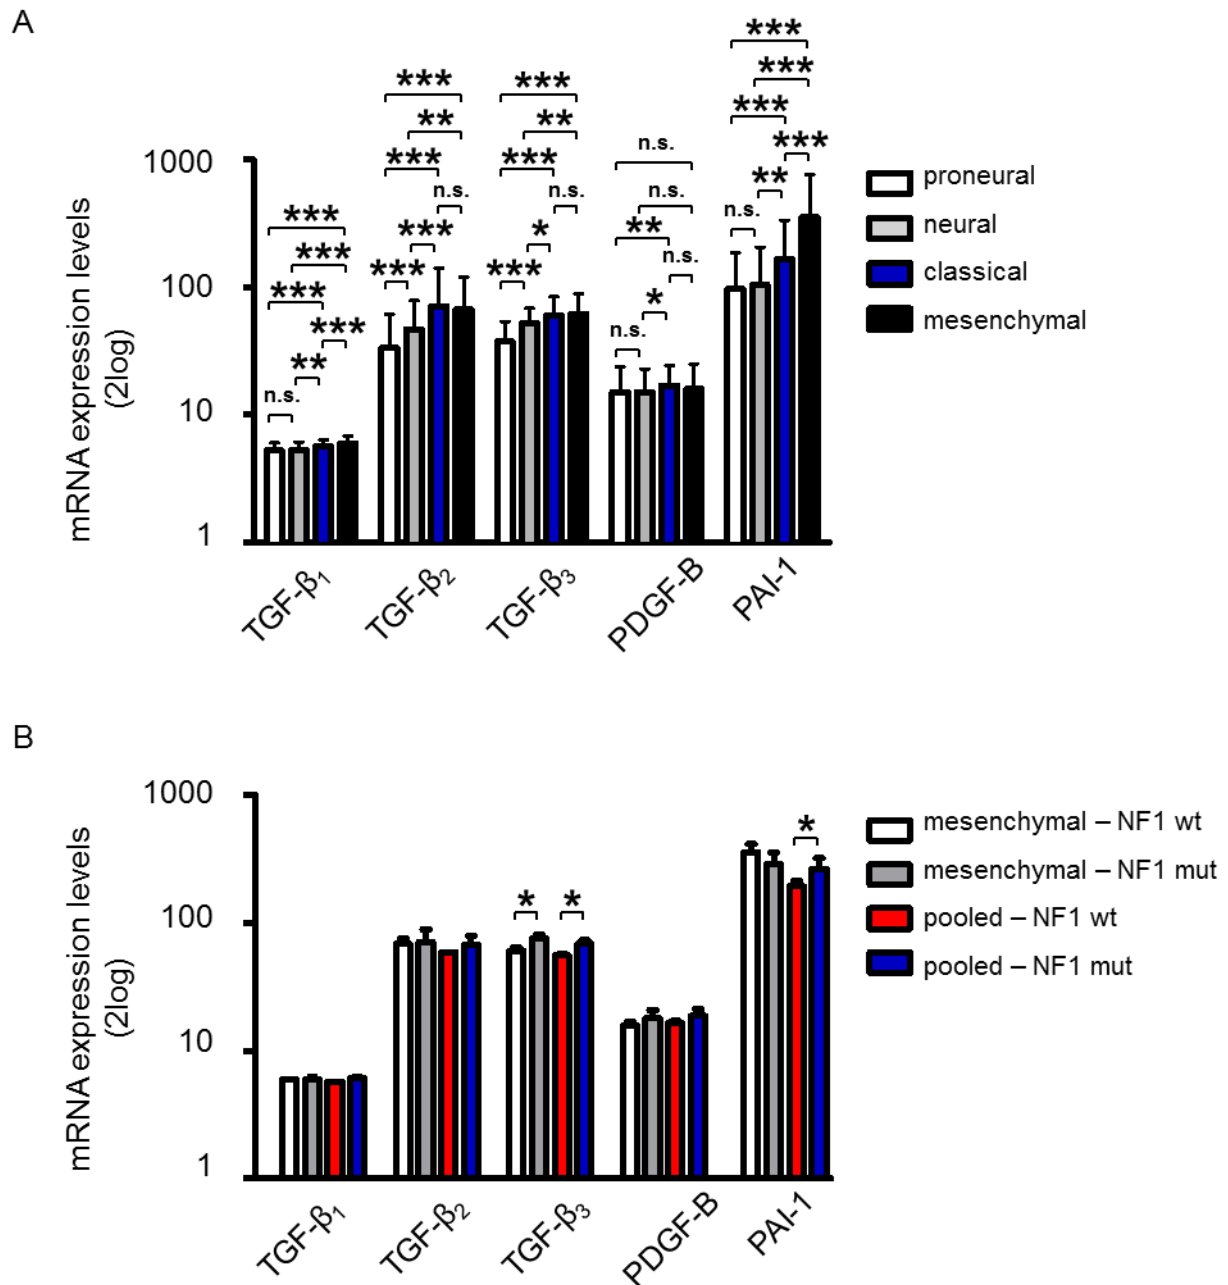

**Supplementary Figure 9:** *TGF- $\beta_{1-3}$  gene and TGF- $\beta$  target gene expression in glioblastoma subtypes based on gene expression data.* A, mRNA expression levels are shown for proneural, neural, classical and mesenchymal glioblastoma patients. B, mRNA expression levels are shown for glioblastoma patients based on their NF1 mutation status. Statistical significances of  $p < 0.05$  (\*),  $p < 0.01$  (\*\*) and  $p < 0.001$  (\*\*\*) were determined using the Mann-Whitney test. Values are represented in a logarithmic scale. Data were obtained from the TCGA database.

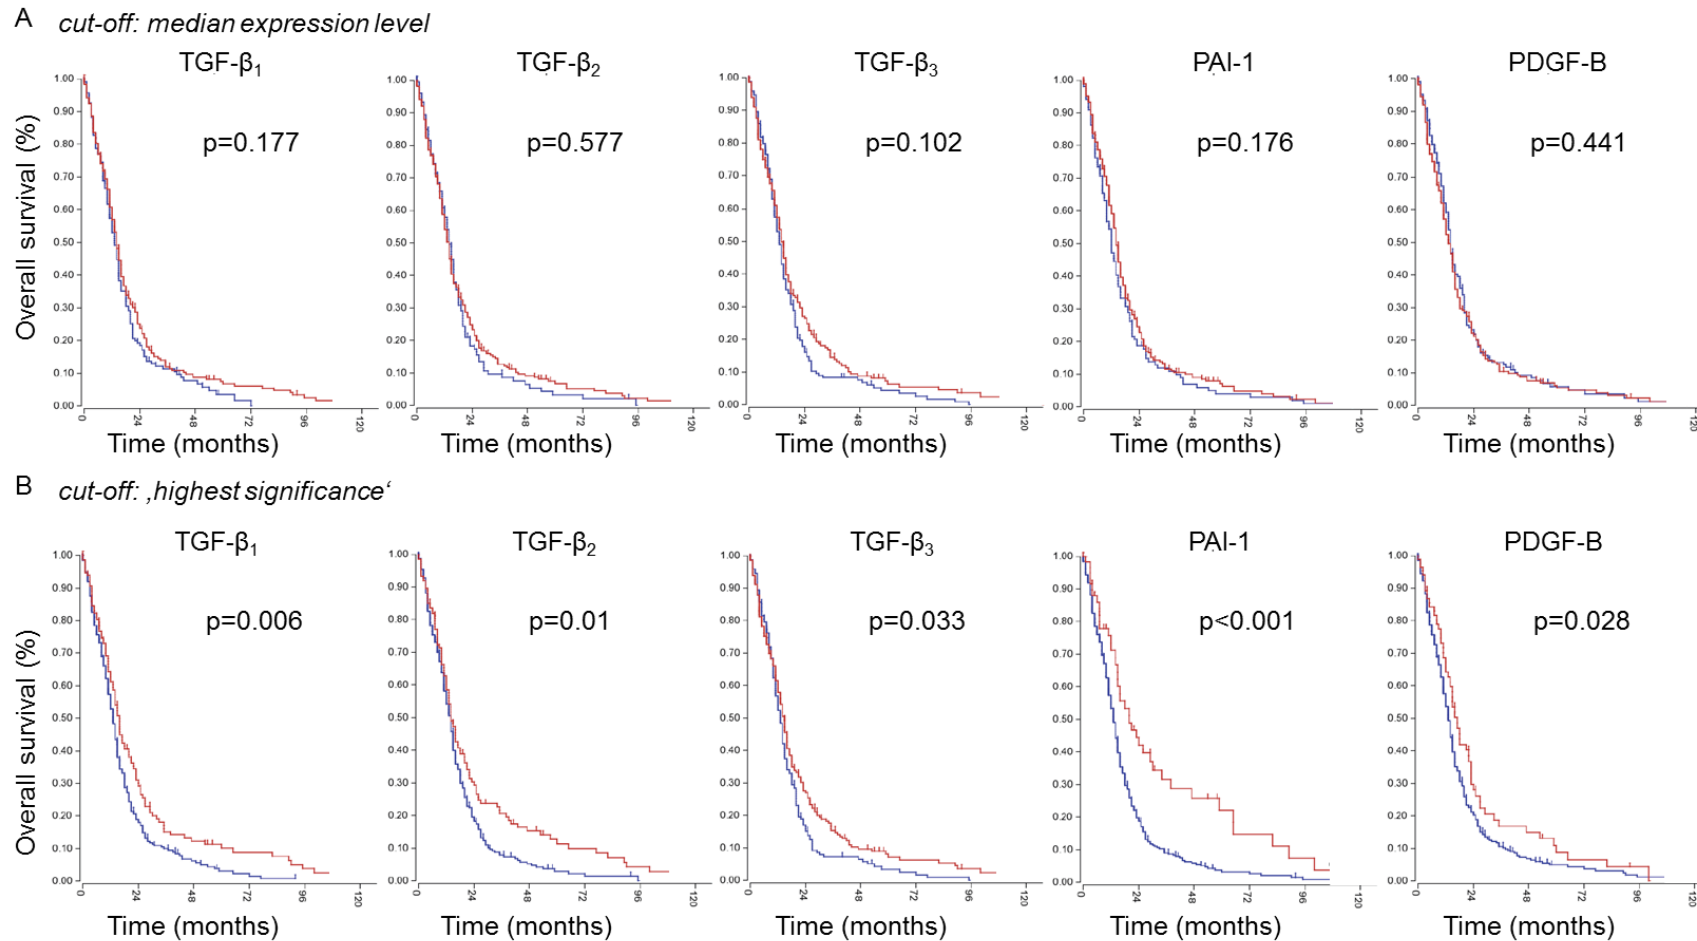

**Supplementary Figure 10:** *TGF- $\beta$  pathway activity and outcome – an analysis of the TCGA database.*

Kaplan-Meier survival curves of overall survival are shown for newly diagnosed glioblastomas. Patients were divided into two groups with high (blue) or low (red) expression of the target gene. The cut-off was defined by the median mRNA expression level of the target (A) or the expression level that results in the highest association with survival (B). Statistical significances (p) were determined using the log-rank test (p < 0.05 was considered significant).
